# Supplementary material for: Postprandial NMR-Based Metabolic Exchanges Reflect Impaired Phenotypic Flexibility across Splanchnic Organs in the Obese Yucatan Mini-Pig
Source: MDPI journal article supplement (doi:10.3390/nu12082442), 2020-08-14
Supplement: s1 [file s1]

**Supplementary Table 2.** Postprandial response of metabolites across the intestine.

|                       |               | Total postprandial AUC | Maximum delta change from fasting |
|-----------------------|---------------|------------------------|-----------------------------------|
| <i>Lysine</i>         | <i>Day 0</i>  | 1.05 ± 1.39            | -2.72 ± 3.88                      |
|                       | <i>Day 60</i> | -2.41 ± 1.11           | -1.90 ± 5.40                      |
| <i>Threonine</i>      | <i>Day 0</i>  | 13.49 ± 2.64*          | 5.28 ± 7.87                       |
|                       | <i>Day 60</i> | 11.47 ± 0.96*          | 11.83 ± 4.56                      |
| <i>Citrate</i>        | <i>Day 0</i>  | 7.11 ± 5.52            | 21.70 ± 35.15                     |
|                       | <i>Day 60</i> | 5.63 ± 3.44            | 1.78 ± 10.68                      |
| <i>Isoleucine</i>     | <i>Day 0</i>  | 8.12 ± 4.34            | -25.75 ± 11.28                    |
|                       | <i>Day 60</i> | -4.44 ± 4.58#          | 10.53 ± 8.82                      |
| <i>Valine</i>         | <i>Day 0</i>  | -6.35 ± 5.28           | 2.13 ± 21.55                      |
|                       | <i>Day 60</i> | 2.63 ± 2.29            | -15.01 ± 9.31                     |
| <i>Leucine</i>        | <i>Day 0</i>  | 0.35 ± 1.65            | 12.94 ± 6.22                      |
|                       | <i>Day 60</i> | 0.99 ± 0.52            | -4.74 ± 6.97                      |
| <i>BCAA</i>           | <i>Day 0</i>  | 0.33 ± 1.48            | 1.56 ± 6.99                       |
|                       | <i>Day 60</i> | 0.08 ± 0.33            | -4.65 ± 6.40                      |
| <i>Tryptophan</i>     | <i>Day 0</i>  | 16.91 ± 2.29*          | 19.19 ± 19.04                     |
|                       | <i>Day 60</i> | 21.09 ± 3.58*\$        | 41.21 ± 7.97                      |
| <i>Betaine</i>        | <i>Day 0</i>  | 10.18 ± 1.89*\$        | 21.46 ± 2.04                      |
|                       | <i>Day 60</i> | 11.72 ± 2.91*\$        | 25.69 ± 2.42                      |
| <i>Phosphocholine</i> | <i>Day 0</i>  | 25.63 ± 4.86*          | 28.46 ± 12.71                     |
|                       | <i>Day 60</i> | 19.27 ± 2.44*\$        | 37.69 ± 7.56                      |
| <i>Alanine</i>        | <i>Day 0</i>  | -12.77 ± 0.95*\$       | -9.63 ± 3.67                      |
|                       | <i>Day 60</i> | -15.35 ± 1.32*         | -6.37 ± 3.53                      |
| <i>Asparagine</i>     | <i>Day 0</i>  | -0.35 ± 2.82           | -19.68 ± 9.61                     |
|                       | <i>Day 60</i> | -3.37 ± 1.05*          | -15.12 ± 7.05                     |
| <i>Formic</i>         | <i>Day 0</i>  | -27.17 ± 1.47*         | 10.44 ± 5.98                      |
|                       | <i>Day 60</i> | -26.25 ± 5.30*         | -10.28 ± 19.10                    |
| <i>Lipids</i>         | <i>Day 0</i>  | 12.57 ± 1.34*\$        | 21.31 ± 2.64                      |
|                       | <i>Day 60</i> | 16.07 ± 1.81*\$        | 16.50 ± 0.87                      |
| <i>Methionine</i>     | <i>Day 0</i>  | 9.55 ± 3.27*           | 8.83 ± 11.69                      |
|                       | <i>Day 60</i> | 7.33 ± 2.61*           | -13.33 ± 7.44                     |
| <i>Glutamate</i>      | <i>Day 0</i>  | 5.70 ± 1.48*           | -7.75 ± 3.92                      |
|                       | <i>Day 60</i> | 4.13 ± 0.97*           | -6.64 ± 6.55                      |
| <i>Lactate</i>        | <i>Day 0</i>  | -14.89 ± 5.97\$        | -59.06 ± 6.86                     |
|                       | <i>Day 60</i> | -11.49 ± 7.97          | 15.70 ± 35.75                     |
| <i>Pyruvate</i>       | <i>Day 0</i>  | -0.85 ± 2.86           | 3.61 ± 8.89                       |
|                       | <i>Day 60</i> | 2.94 ± 4.29            | 17.43 ± 12.17                     |
| <i>Tyrosine</i>       | <i>Day 0</i>  | -0.04 ± 2.82           | 2.16 ± 13.31                      |
|                       | <i>Day 60</i> | 1.24 ± 5.54\$          | -7.59 ± 4.25                      |
| <i>Histidine</i>      | <i>Day 0</i>  | -0.45 ± 1.61           | -3.30 ± 6.85                      |
|                       | <i>Day 60</i> | -2.01 ± 1.18           | 0.98 ± 4.57                       |
| <i>Ethanolamine</i>   | <i>Day 0</i>  | -4.46 ± 1.08*          | 2.50 ± 7.48                       |
|                       | <i>Day 60</i> | -3.08 ± 1.91           | -6.73 ± 8.90                      |

\*, significant (p<0.05) exchange across the intestine. For the AUC, negative values mean release and positive values means uptake of a given metabolite. For the delta change, negative values mean decrease, while positive values mean increase in the exchange of a given metabolite following the meal. \$, significant different between the fasting and the integrated postprandial exchange (p<0.05). Comparison against D0: #, p<0.05.
