# Supplementary material for: Postprandial NMR-Based Metabolic Exchanges Reflect Impaired Phenotypic Flexibility across Splanchnic Organs in the Obese Yucatan Mini-Pig
Source: MDPI journal article supplement (doi:10.3390/nu12082442), 2020-08-14
Supplement: s1 [file s1]

**Supplementary Table S3.** Pearson correlations performed between the HOMA-IR or the BW and the AUC exchange values for each metabolite to identify metabolites that are release or take up in greater/smaller amount depending on the HOMA-IR or BW.

| HOMA-IR vs Liver metabolites AUC |                         |         |
|----------------------------------|-------------------------|---------|
|                                  | correlation coefficient | p-value |
| Citrate                          | -0.39                   | 0.2640  |
| Glycerophosphocholine            | -0.35                   | 0.3276  |
| Acetate                          | -0.10                   | 0.7798  |
| Betaine                          | 0.00                    | 0.9910  |
| Alanine                          | 0.01                    | 0.9837  |
| Methionine                       | 0.05                    | 0.8967  |
| Gluconeogenic AA                 | 0.10                    | 0.7797  |
| Choline                          | 0.13                    | 0.7234  |
| Phenlyalanine                    | 0.14                    | 0.7069  |
| Asparragine                      | 0.23                    | 0.5222  |
| Glycine                          | 0.24                    | 0.5038  |
| Lysine                           | 0.25                    | 0.4779  |
| Glutamine                        | 0.33                    | 0.3542  |
| Glucose                          | 0.35                    | 0.3238  |
| Threonine                        | 0.38                    | 0.2829  |
| Phosphocholine                   | 0.40                    | 0.2572  |
| Tryptophan                       | 0.41                    | 0.2453  |
| Histidine                        | 0.46                    | 0.1762  |
| Succinate                        | 0.49                    | 0.1550  |
| Creatine                         | 0.49                    | 0.1520  |
| Formic acid                      | 0.52                    | 0.1234  |
| Lipids                           | 0.53                    | 0.1135  |
| Propionate                       | 0.54                    | 0.1108  |
| Tyrosine                         | 0.59                    | 0.0734  |
| Glutamate                        | 0.65                    | 0.0439  |
| Proline                          | 0.69                    | 0.0269  |
| Ethanolamine                     | 0.76                    | 0.0100  |
| Lactate                          | 0.90                    | 0.0004  |

**Supplementary Table S4.** Pearson correlations performed between the HOMA-IR or the BW and the AUC exchange values for each metabolite to identify metabolites that are release or take up in greater/smaller amount depending on the HOMA-IR or BW.

| BW vs Liver metabolites AUC |                         |         |
|-----------------------------|-------------------------|---------|
|                             | correlation coefficient | p-value |
| Citrate                     | -0.34                   | 0.333   |
| Choline                     | -0.11                   | 0.762   |
| Glycerophosphocholine       | -0.09                   | 0.812   |
| Betaine                     | 0.18                    | 0.612   |
| Glucose                     | 0.20                    | 0.586   |
| Methionine                  | 0.23                    | 0.527   |
| Phenlyalanine               | 0.30                    | 0.402   |
| Creatine                    | 0.32                    | 0.373   |
| Tyrosine                    | 0.32                    | 0.370   |
| Threonine                   | 0.34                    | 0.341   |
| Gluconeogenic AA            | 0.40                    | 0.248   |
| Acetate                     | 0.42                    | 0.227   |
| Asparragine                 | 0.42                    | 0.224   |
| Succinate                   | 0.44                    | 0.198   |
| Glutamine                   | 0.45                    | 0.189   |
| Alanine                     | 0.50                    | 0.137   |
| Phosphocholine              | 0.51                    | 0.136   |
| Tryptophan                  | 0.55                    | 0.102   |
| Glycine                     | 0.59                    | 0.073   |
| Lactate                     | 0.61                    | 0.064   |
| Formic acid                 | 0.63                    | 0.046   |
| Lysine                      | 0.64                    | 0.045   |
| Histidine                   | 0.67                    | 0.033   |
| Lipids                      | 0.70                    | 0.024   |
| Proline                     | 0.71                    | 0.022   |
| Propionate                  | 0.78                    | 0.007   |
| Glutamate                   | 0.79                    | 0.007   |
| Ethanolamine                | 0.85                    | 0.002   |

**Supplementary Table S5.** Pearson correlations performed between the HOMA-IR or the BW and the AUC exchange values for each metabolite to identify metabolites that are release or take up in greater/smaller amount depending on the HOMA-IR or BW.

| HOMA-IR vs Intestine metabolites AUC |                         |         |
|--------------------------------------|-------------------------|---------|
|                                      | correlation coefficient | p-value |
| Asparragine                          | -0.58                   | 0.0794  |
| Citrate                              | -0.53                   | 0.1188  |
| Phosphocholine                       | -0.41                   | 0.2334  |
| Histidine                            | -0.35                   | 0.3271  |
| Glutamine                            | -0.34                   | 0.3319  |
| Glutamate                            | -0.34                   | 0.3371  |
| Glycerophosphocholine                | -0.32                   | 0.3724  |
| Threonine                            | -0.29                   | 0.4220  |
| Lysine                               | -0.21                   | 0.5689  |
| Methionine                           | -0.10                   | 0.7769  |
| Formic acid                          | -0.06                   | 0.8723  |
| Phenlyalanine                        | -0.03                   | 0.9360  |
| Lactate                              | 0.06                    | 0.8714  |
| Choline                              | 0.10                    | 0.7821  |
| Betaine                              | 0.26                    | 0.4691  |
| Alanine                              | 0.28                    | 0.4338  |
| Lipids                               | 0.29                    | 0.4212  |
| Proline                              | 0.29                    | 0.4088  |
| Tyrosine                             | 0.30                    | 0.4076  |
| Gluconeogenic AA                     | 0.31                    | 0.3802  |
| Succinate                            | 0.36                    | 0.3106  |
| Ethanolamine                         | 0.36                    | 0.3067  |
| Glycine                              | 0.41                    | 0.2349  |
| Tryptophan                           | 0.53                    | 0.1119  |
| Acetate                              | 0.57                    | 0.0826  |
| Glucose                              | 0.63                    | 0.0490  |
| Creatine                             | 0.66                    | 0.0371  |
| Propionate                           | 0.69                    | 0.0281  |

**Supplementary Table S6.** Pearson correlations performed between the HOMA-IR or the BW and the AUC exchange values for each metabolite to identify metabolites that are release or take up in greater/smaller amount depending on the HOMA-IR or BW.

| BW vs Intestine metabolites AUC |                         |         |
|---------------------------------|-------------------------|---------|
|                                 | correlation coefficient | p-value |
| BCAA AUC-I                      | -0.60                   | 0.0479  |
| Glutamine                       | -0.51                   | 0.1281  |
| Citrate                         | -0.40                   | 0.2542  |
| Lactate                         | -0.28                   | 0.4352  |
| Phosphocholine                  | -0.24                   | 0.5052  |
| Glycerophosphocholine           | -0.22                   | 0.5477  |
| Glutamate                       | -0.19                   | 0.6084  |
| Formic acid                     | -0.10                   | 0.7768  |
| Methionine                      | -0.07                   | 0.8378  |
| Threonine                       | -0.07                   | 0.8529  |
| Histidine                       | -0.06                   | 0.8775  |
| Tyrosine                        | 0.05                    | 0.8917  |
| Choline                         | 0.05                    | 0.8806  |
| Succinate                       | 0.08                    | 0.8358  |
| Asparagine                      | 0.09                    | 0.8143  |
| Betaine                         | 0.10                    | 0.7882  |
| Ethanolamine                    | 0.13                    | 0.7124  |
| Phenylalanine                   | 0.18                    | 0.6100  |
| Proline                         | 0.23                    | 0.5312  |
| Lysine                          | 0.31                    | 0.3792  |
| Creatine                        | 0.41                    | 0.2358  |
| Tryptophan                      | 0.45                    | 0.1954  |
| Lipids                          | 0.53                    | 0.1150  |
| Alanine                         | 0.61                    | 0.0625  |
| Gluconeogenic AA                | 0.65                    | 0.0416  |
| Acetate                         | 0.77                    | 0.0089  |
| Propionate                      | 0.79                    | 0.0063  |
| Glucose                         | 0.81                    | 0.0042  |
| Glycine                         | 0.90                    | 0.0003  |
