# Supplementary material for: Postprandial NMR-Based Metabolic Exchanges Reflect Impaired Phenotypic Flexibility across Splanchnic Organs in the Obese Yucatan Mini-Pig
Source: MDPI journal article supplement (doi:10.3390/nu12082442), 2020-08-14
Supplement: s1 [file s1]

**Supplementary Table 1.** Postprandial response of metabolites across the liver.

|                               |               | Total postprandial AUC | Maximum delta change from fasting |
|-------------------------------|---------------|------------------------|-----------------------------------|
| <i>Lysine</i>                 | <i>Day 0</i>  | 4.47 ± 0.27*           | -6.02 ± 5.53                      |
|                               | <i>Day 60</i> | 6.43 ± 0.96*           | 2.90 ± 5.68                       |
| <i>Threonine</i>              | <i>Day 0</i>  | -1.82 ± 1.10           | -3.31 ± 6.47                      |
|                               | <i>Day 60</i> | 3.02 ± 1.40            | -4.77 ± 5.26                      |
| <i>Citrate</i>                | <i>Day 0</i>  | 8.59 ± 4.45            | -26.02 ± 23.39                    |
|                               | <i>Day 60</i> | 4.71 ± 2.31            | 7.37 ± 19.32                      |
| <i>Isoleucine</i>             | <i>Day 0</i>  | 18.26 ± 4.23*          | 31.13 ± 12.18                     |
|                               | <i>Day 60</i> | 2.36 ± 3.70#           | -28.37 ± 26.22                    |
| <i>Proline</i>                | <i>Day 0</i>  | 1.85 ± 1.04            | -19.05 ± 10.17                    |
|                               | <i>Day 60</i> | 3.42 ± 1.03*\$         | 7.86 ± 3.56                       |
| <i>Acetate</i>                | <i>Day 0</i>  | -8.80 ± 2.77           | -10.32 ± 14.96                    |
|                               | <i>Day 60</i> | 1.44 ± 6.98            | 1.68 ± 34.98                      |
| <i>Tryptophan</i>             | <i>Day 0</i>  | -6.33 ± 1.95*          | 11.46 ± 15.22                     |
|                               | <i>Day 60</i> | -5.22 ± 3.78           | -4.42 ± 18.76                     |
| <i>Creatine</i>               | <i>Day 0</i>  | 0.03 ± 0.78            | 2.70 ± 6.23                       |
|                               | <i>Day 60</i> | -3.21 ± 1.43           | -0.55 ± 11.17                     |
| <i>Betaine</i>                | <i>Day 0</i>  | 13.15 ± 3.11*          | 3.48 ± 11.04                      |
|                               | <i>Day 60</i> | 14.26 ± 1.15*          | -1.23 ± 7.60                      |
| <i>Phosphocholine</i>         | <i>Day 0</i>  | -1.63 ± 0.89           | 3.52 ± 9.56                       |
|                               | <i>Day 60</i> | -1.91 ± 0.91           | -14.12 ± 9.29                     |
| <i>Alanine</i>                | <i>Day 0</i>  | 24.04 ± 2.66*          | -36.96 ± 14.06                    |
|                               | <i>Day 60</i> | 26.21 ± 2.74*          | 2.45 ± 10.29                      |
| <i>Asparagine</i>             | <i>Day 0</i>  | 4.53 ± 1.98            | -17.34 ± 11.51                    |
|                               | <i>Day 60</i> | 4.15 ± 1.32*           | 13.02 ± 9.41                      |
| <i>Methionine</i>             | <i>Day 0</i>  | 0.27 ± 2.80            | -23.02 ± 8.09                     |
|                               | <i>Day 60</i> | 4.63 ± 1.96            | 12.49 ± 6.21#                     |
| <i>Lipids</i>                 | <i>Day 0</i>  | -0.71 ± 0.46           | -1.52 ± 3.43                      |
|                               | <i>Day 60</i> | -0.24 ± 1.91           | 0.66 ± 4.50                       |
| <i>Glycero-phosphocholine</i> | <i>Day 0</i>  | 3.31 ± 0.26            | 3.18 ± 4.85                       |
|                               | <i>Day 60</i> | -0.26 ± 1.32           | -9.97 ± 5.30                      |
| <i>Glutamine</i>              | <i>Day 0</i>  | 13.67 ± 2.77*          | -0.62 ± 13.78                     |
|                               | <i>Day 60</i> | 16.99 ± 1.30*          | 15.73 ± 12.91                     |
| <i>Valine</i>                 | <i>Day 0</i>  | -13.61 ± 3.60*         | -8.58 ± 17.11                     |
|                               | <i>Day 60</i> | 4.90 ± 2.42#           | 21.34 ± 14.22                     |
| <i>Leucine</i>                | <i>Day 0</i>  | -4.06 ± 1.47           | 2.41 ± 9.12                       |
|                               | <i>Day 60</i> | 2.92 ± 1.27#           | 7.13 ± 8.87                       |
| <i>Tyrosine</i>               | <i>Day 0</i>  | 9.88 ± 3.65*           | -10.76 ± 10.24                    |
|                               | <i>Day 60</i> | 19.64 ± 3.16*,#        | 12.78 ± 7.76                      |
| <i>Phenylalanine</i>          | <i>Day 0</i>  | 12.22 ± 2.30*          | 2.86 ± 11.29                      |
|                               | <i>Day 60</i> | 12.54 ± 3.06*\$        | 50.43 ± 11.23                     |
| <i>Glucose</i>                | <i>Day 0</i>  | -4.24 ± 0.74*          | 3.92 ± 3.50                       |
|                               | <i>Day 60</i> | -5.17 ± 2.14           | 1.01 ± 5.14                       |

\*, significant (p<0.05) exchange across the liver. For the AUC, negative values mean release and positive values means uptake of a given metabolite. For the delta change, negative values mean decrease, while positive values mean increase in the exchange of a given metabolite following the meal. \$, significant different between the fasting and the integrated postprandial exchange (p<0.05). Comparison against D0: #, p<0.05.
